# Supplementary material for: Inducing abundant magnetic phases and enhancing magnetic stability by edge modifications and physical regulations for NiI2 nanoribbons
Source: Royal Society of Chemistry journal article supplement (doi:10.1039/d3cp04536f), 2024-01-01
Supplement: d3cp04536f1.pdf [file d3cp04536f1.pdf]

## Supplementary Information

### Inducing Abundant Magnetic Phases and Enhancing Magnetic Stability by Edge Modifications and Physical Regulations for NiI<sub>2</sub> Nanoribbons

Yu Yi, Jianing Han\*, Zhanhai Li, Shengguo Cao, Zhenhua Zhang\*

*Hunan Provincial Key Laboratory of Flexible Electronic Materials Genome Engineering, Changsha University of Science and Technology, Changsha 410114, China.*

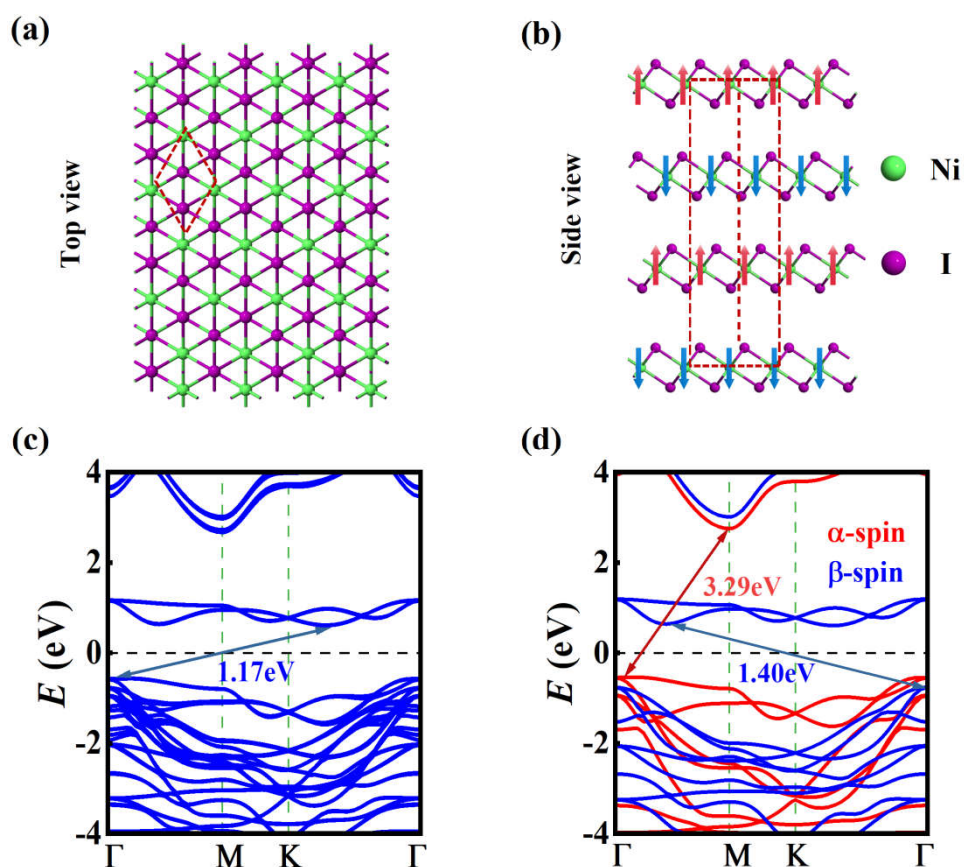

**Fig. S1.** (a) Top view, (b) side view and magnetic ordering of bulk NiI<sub>2</sub> atomic structure, in which the red dashed rhombus indicates the 1×1 unit cell. (c) Band structure of bulk NiI<sub>2</sub>. (d) Band structure of NiI<sub>2</sub> monolayer.

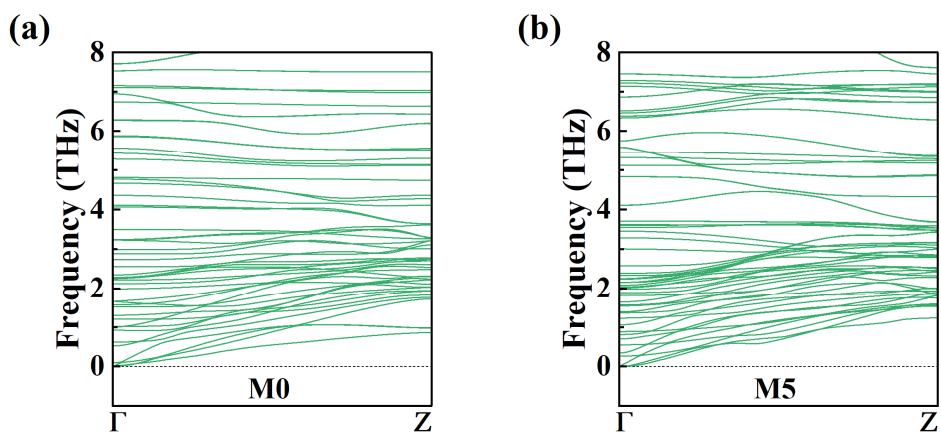

Fig. S2. Phonon dispersion for ZnNi<sub>2</sub>NRs. (a) M0, (b) M5.

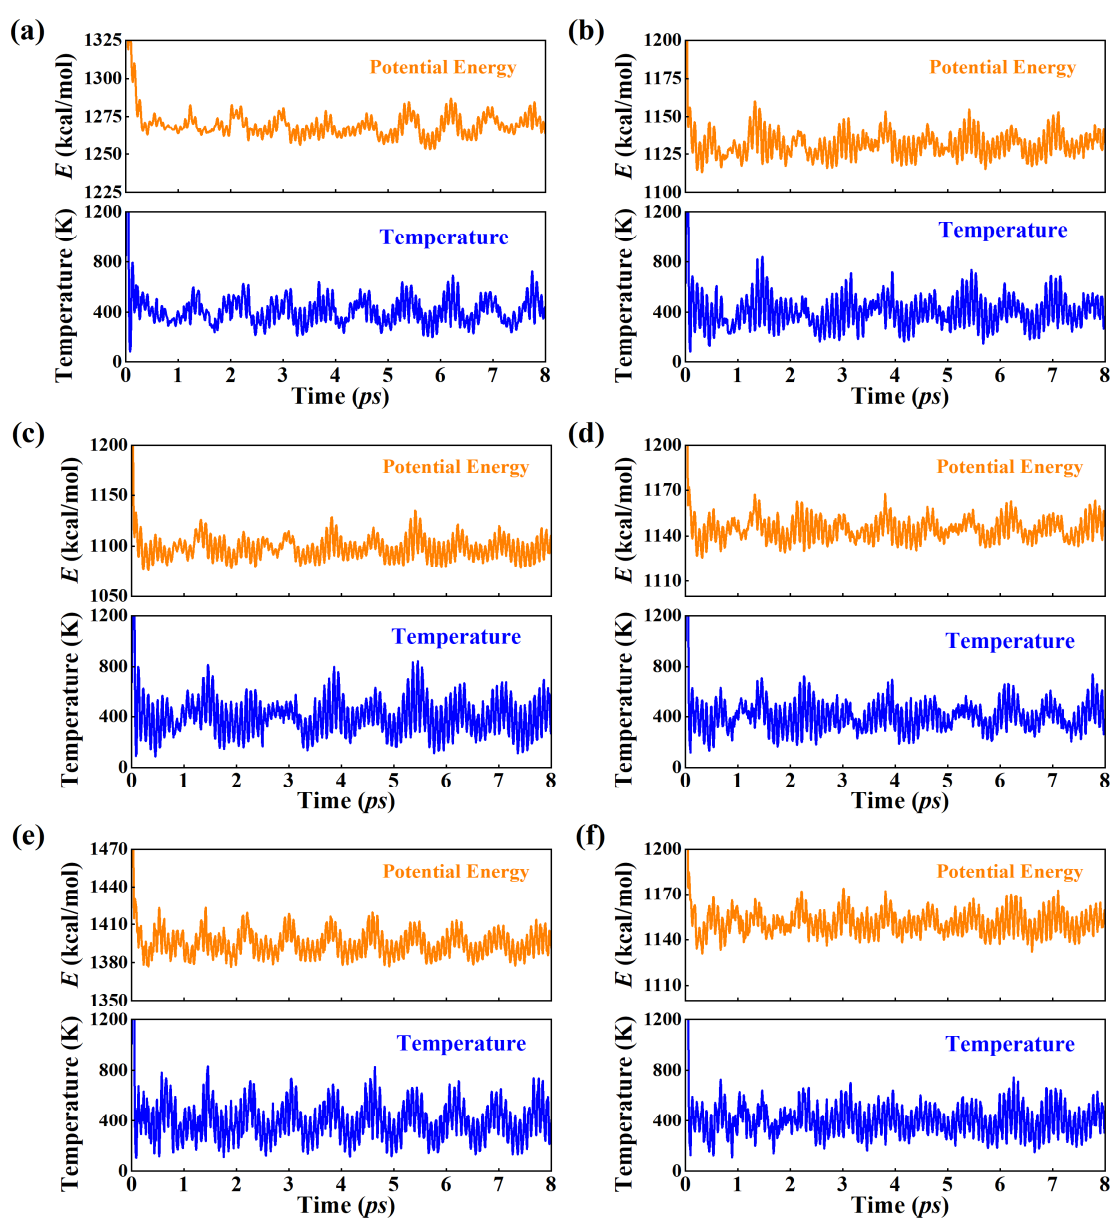

Fig. S3. Energy and temperature versus time profiles of nanoribbons in annealing molecular dynamics simulations.

(a) M0, (b) M1, (c) M2, (d) M3, (e) M4, and (f) M5.

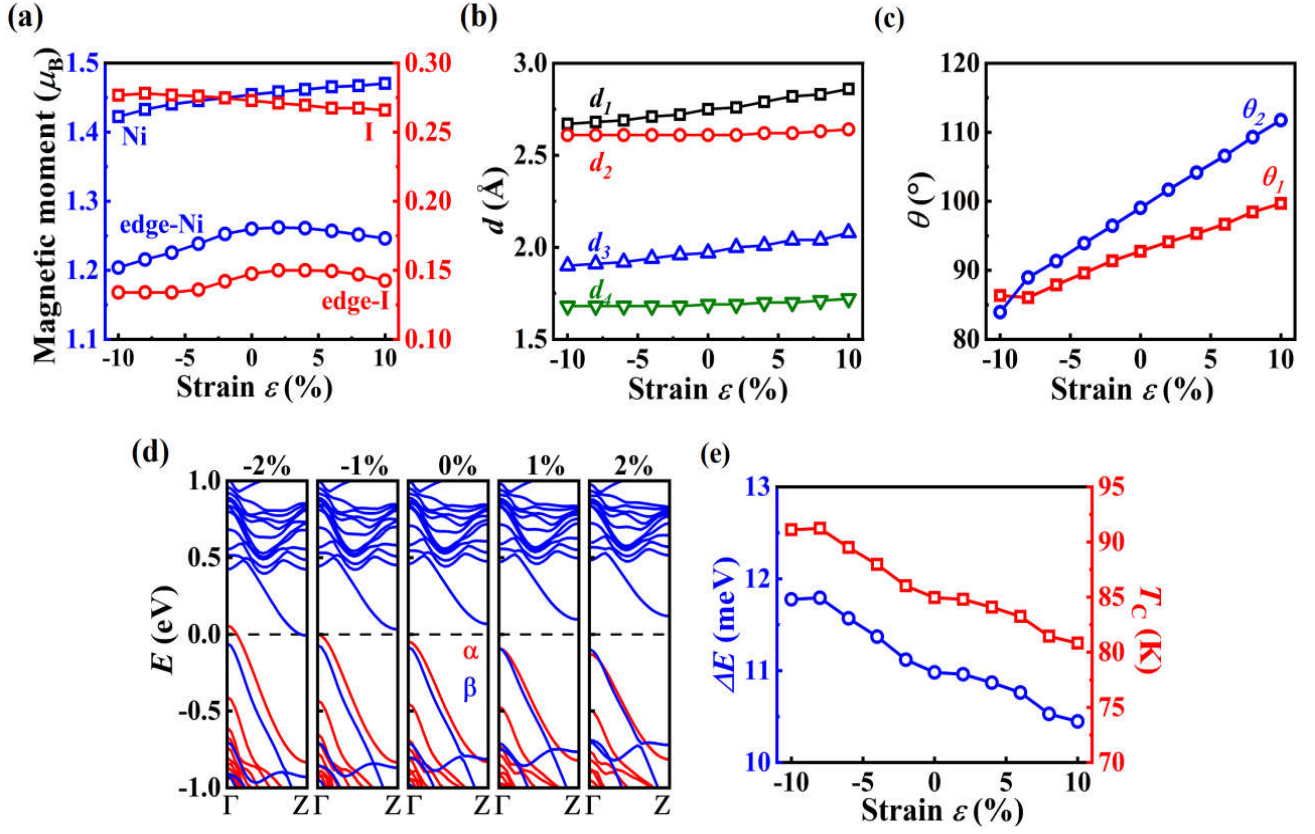

**Fig. S4.** For M3. (a) Averaged magnetic moment for whole ribbon and edged Ni and I atoms in the FM state versus strain, (b) edged atom bond lengths  $d_1$ ,  $d_2$ ,  $d_3$ , and  $d_4$  versus strain, (c) edge atom bond angles  $\theta_1$  and  $\theta_2$  versus strain, (d) the band structure in the FM state versus strain, and (e) magnetic exchange energy  $\Delta E$  and Curie temperature  $T_C$  versus strain.
